# Supplementary material for: Palladium-catalyzed synthesis of benzoxazoles by the cleavage reaction of carbon–carbon triple bonds with o-aminophenol
Source: Royal Society of Chemistry journal article supplement (doi:10.1039/c3gc42499e), 2014-01-01

## Supporting Information

### Palladium-catalyzed Synthesis of Benzoxazoles by the Cleavage Reaction of Carbon-carbon Triple Bond with *o*-Aminophenol

Hou-Zhi Xie<sup>§,a,b</sup>, Qi Gao<sup>§,a,b</sup>, Ying Liang<sup>a,\*</sup>, Heng-Shan Wang<sup>b</sup> and Ying-Ming Pan<sup>b,\*</sup>

<sup>a</sup> *School of Life and Environmental Sciences, Guilin University of Electronic Technology, Guilin, 541004, China*

<sup>b</sup> *Key Laboratory for the Chemistry and Molecular Engineering of Medicinal Resources (Ministry of Education of China), School of Chemistry & Chemical Engineering of Guangxi Normal University, Guilin 541004, People's Republic of China*

S2-S8            Experimental and spectral data of compounds

S9-S22        Copies of <sup>1</sup>H and <sup>13</sup>C NMR spectra of all compounds.

---

\*Correspondence authors

Tel: (+86)-773-5846279;

E-mail: yingl@ailiyun.com; panym2013@hotmail.com.

## Experimental

**1 General methods and materials** Melting points were uncorrected. NMR spectra were in CDCl<sub>3</sub> (<sup>1</sup>H at 500 MHz or 400 MHz and <sup>13</sup>C at 125 MHz or 100 MHz). Column chromatography was performed on silica gel (300-400 mesh). Unless otherwise noted, all reagents were obtained commercially and used without further purification.

### 2 General procedure for the formation of benzoxazoles

The reaction mixture of *o*-aminophenol (**1a**, 109.1 mg 1.0 mmol), diphenylacetylene (**2a**, 89 mg, 0.5 mmol), PdCl<sub>2</sub> (4.4 mg, 0.0025 mmol), PhCl (1 mL) in a 10 mL flask was stirred at reflux and monitored periodically by TLC. Upon completion, chlorobenzene was removed under reduced pressure using an aspirator, and then the residue was purified by flash chromatography (hexane/ethyl acetate = 40:1) on silica gel to yield the desired product **3aa** as white solid (167.8 mg, 86% yield), mp 101.7-103.5 °C.

#### 2-Phenylbenzo[d]oxazole (**3aa**, CAS: 833-50-1)<sup>[1]</sup>

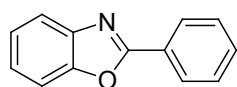

<sup>1</sup>H NMR (400 MHz, CDCl<sub>3</sub>) δ 8.29-8.24 (m, 2H), 7.81-7.76 (m, 1H), 7.62-7.57 (m, 1H), 7.56-7.51 (m, 3H), 7.38-7.33 (m, 2H). <sup>13</sup>C NMR (100 MHz, CDCl<sub>3</sub>) δ 163.05, 150.78, 142.13, 131.50, 128.90, 127.63, 127.20, 125.09, 124.56, 120.02, 110.57. *m/z* (MS): 196 [M+H]<sup>+</sup>.

#### 2-(4-Methylphenyl)benzo[d]oxazole (**3ab**, CAS: 835-71-2)<sup>[1]</sup>

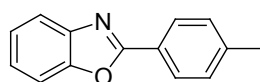

The reaction was conducted with *o*-aminophenol (**1a**, 109.1 mg, 1.0 mmol), 1,2-bis(4-methylphenyl)acetylene (**2b**, 103.1 mg, 0.5 mmol). The residue was purified by flash chromatography (hexane/ethyl acetate = 40:1) on silica gel to yield the desired product **3ab** as colorless solid (163.1 mg, 78% yield), mp 110.2-111.7 °C.

<sup>1</sup>H NMR (500 MHz, CDCl<sub>3</sub>) δ 8.14 (d, *J* = 8.1 Hz, 2H), 7.77-7.76 (m, 1H), 7.55-7.74 (m, 1H), 7.35-7.31 (m, 4H), 2.41 (s, 3H). <sup>13</sup>C NMR (125 MHz, CDCl<sub>3</sub>) δ 163.18, 150.59, 142.12, 141.89, 129.51, 127.49, 124.74, 124.35, 119.74, 110.37, 21.50. *m/z* (MS): 210 [M+H]<sup>+</sup>.

### 2-(4-Methoxyphenyl)benzo[d]oxazole (**3ac**, CAS: 838-34-6)<sup>[1]</sup>

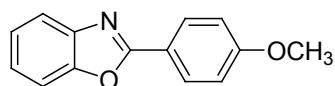

The reaction was conducted with *o*-aminophenol (**1a**, 109.1 mg, 1.0 mmol), 1,2-bis(4-methoxyphenyl)acetylene (**2c**, 119.1 mg, 0.5 mmol). The residue was purified by flash chromatography (hexane/ethyl acetate = 40:1) on silica gel to yield the desired product **3ac** as colorless solid (164.3 mg, 73% yield), mp 101.2-102.5 °C.

<sup>1</sup>H NMR (500 MHz, CDCl<sub>3</sub>) δ 8.24-8.18 (m, 2H), 7.74 (dd, *J* = 5.5, 2.1 Hz, 1H), 7.56 (d, *J* = 6.8 Hz, 1H), 7.36-7.29 (m, 2H), 7.06-7.01 (m, 2H), 3.90 (s, 3H). <sup>13</sup>C NMR (125 MHz, CDCl<sub>3</sub>) δ 163.15, 162.35, 150.70, 142.33, 129.36, 124.53, 124.36, 119.76, 119.61, 114.34, 110.31, 55.37. *m/z* (MS): 226 [M+H]<sup>+</sup>.

### 2-(4-Bromophenyl)benzo[d]oxazole (**3ad**, CAS: 3164-13-4)<sup>[2]</sup>

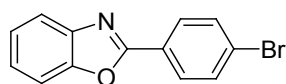

The reaction was conducted with *o*-aminophenol (**1a**, 109.1 mg, 1.0 mmol), 1,2-bis(4-bromophenyl)acetylene (**2d**, 167 mg, 0.5 mmol). The residue was purified by flash chromatography (hexane/ethyl acetate = 40:1) on silica gel to yield the desired product **3ad** as white solid (240.2 mg, 88% yield), mp 157.3-158.1 °C.

<sup>1</sup>H NMR (500 MHz, CDCl<sub>3</sub>) δ 8.12 (d, *J* = 8.8 Hz, 2H), 7.70 (d, *J* = 7.3 Hz, 1H), 7.53 (d, *J* = 7.7 Hz, 1H), 7.37-7.27 (m, 2H), 6.78 (d, *J* = 8.7 Hz, 2H), 3.08 (s, 6H). <sup>13</sup>C

NMR (125 MHz, CDCl<sub>3</sub>)  $\delta$  162.16, 150.81, 142.07, 132.24, 129.02, 126.22, 125.38, 124.75, 120.14, 110.62. *m/z* (MS): 274, 276 [M+H]<sup>+</sup>.

**4-(Benzo[d]oxazol-2-yl)-N,N-dimethylaniline (3ag, CAS: 840-57-3)**<sup>[3]</sup>

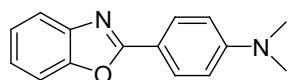

The reaction was conducted with *o*-aminophenol (**1a**, 109.1 mg, 1.0 mmol), 4-(phenylethynyl)-N,N-dimethylaminobenzene (**2g**, 110.6 mg, 0.5 mmol). The residue was purified by flash chromatography (hexane/ethyl acetate = 20:1) on silica gel to yield the desired product **3ag** as white solid (43 mg, 36% yield), mp 182.3-183.7 °C.

<sup>1</sup>H NMR (500 MHz, CDCl<sub>3</sub>)  $\delta$  8.14 (d, *J* = 8.7 Hz, 2H), 7.72 (d, *J* = 7.5 Hz, 1H), 7.54 (d, *J* = 7.8 Hz, 1H), 7.28-7.34 (m, 2H), 6.79 (d, *J* = 8.5 Hz, 2H), 3.09 (s, 6H). <sup>13</sup>C NMR (125 MHz, CDCl<sub>3</sub>)  $\delta$  164.21, 152.42, 150.60, 142.64, 129.09, 124.14, 123.88, 119.12, 111.59, 110.09, 40.11. *m/z* (MS): 239 [M+H]<sup>+</sup>.

**2-(4-Fluorophenyl)benzo[d]oxazole (3ai, CAS: 397-54-6)**<sup>[4]</sup>

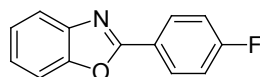

The reaction was conducted with *o*-aminophenol (**1a**, 109.1 mg, 1.0 mmol), 1-(4-fluorophenyl)-2-phenylethyne (**2i**, 98 mg, 0.5 mmol). The residue was purified by flash chromatography (hexane/ethyl acetate = 40:1) on silica gel to yield the desired product **3ai** as pale yellow solid (48 mg, 45% yield), mp 93-94 °C.

<sup>1</sup>H NMR (400 MHz, CDCl<sub>3</sub>)  $\delta$  8.27-8.23 (m, 2H), 7.78-7.74 (m, 1H), 7.58-7.54 (m, 1H), 7.37-7.33 (m, 2H), 7.20 (t, *J* = 8.6 Hz, 2H). <sup>13</sup>C NMR (100 MHz, CDCl<sub>3</sub>)  $\delta$  166.00, 163.49, 162.10, 150.69, 141.98, 129.82, 129.73, 125.10, 124.62, 123.43, 119.93, 116.26, 116.04, 110.53. *m/z* (MS): 214 [M+H]<sup>+</sup>.

**4-(Benzo[d]oxazol-2-yl)benzonitril (3aj, CAS: 838-33-5)**<sup>[2]</sup>

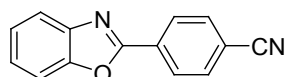

The reaction was conducted with *o*-aminophenol (**1a**, 109.1 mg, 1.0 mmol), 1-(4-cyanophenyl)-2-phenylethyne (**2j**, 101.5 mg, 0.5 mmol). The residue was purified by flash chromatography (hexane/ethyl acetate = 30:1) on silica gel to yield the desired product **3aj** as white solid (51 mg, 46.5% yield), mp 202-204 °C.

<sup>1</sup>H NMR (500 MHz, CDCl<sub>3</sub>) δ 8.41-8.35 (m, 2H), 7.81 (d, *J* = 6.1 Hz, 3H), 7.61 (s, 1H), 7.41 (s, 2H). <sup>13</sup>C NMR (125 MHz, CDCl<sub>3</sub>) δ 160.95, 150.98, 141.96, 132.66, 131.20, 127.99, 126.14, 125.11, 120.61, 118.09, 114.83, 110.85. *m/z* (MS): 221 [M+H]<sup>+</sup>.

### 2-(Naphthalen-2-yl)benzo[d]oxazole (**3ak**, CAS: 14625-56-0)<sup>[5]</sup>

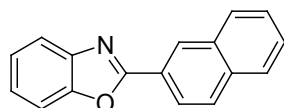

The reaction was conducted with *o*-aminophenol (**1a**, 109.1 mg, 1.0 mmol), 2-(2-phenylethynyl)naphthalene (**2k**, 114 mg, 0.5 mmol). The residue was purified by flash chromatography (hexane/ethyl acetate = 40:1) on silica gel to yield the desired product **3ak** as white solid (49 mg, 40% yield), mp 115.3-116.7 °C.

<sup>1</sup>H NMR (500 MHz, CDCl<sub>3</sub>) δ 9.51 (d, *J* = 8.7 Hz, 1H), 8.44 (d, *J* = 7.3 Hz, 1H), 8.03 (d, *J* = 8.2 Hz, 1H), 7.95-7.90 (m, 2H), 7.73 (t, *J* = 7.7 Hz, 1H), 7.66-7.64 (m, 1H), 7.62-7.59 (m, 2H), 7.42-7.40 (m, 2H). <sup>13</sup>C NMR (125 MHz, CDCl<sub>3</sub>) δ 162.79, 150.17, 142.33, 133.96, 132.24, 130.70, 129.27, 128.62, 127.85, 126.40, 126.30, 125.22, 124.88, 124.45, 123.61, 120.26, 110.45. *m/z* (MS): 246 [M+H]<sup>+</sup>.

### 2-(Pyridin-2-yl)benzo[d]oxazole (**3al**, CAS: 32959-62-9)<sup>[5]</sup>

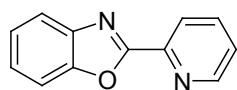

The reaction was conducted with *o*-aminophenol (**1a**, 109.1 mg, 1.0 mmol), 1-(2-pyridyl)-2-phenylethyne (**2l**, 89.5 mg, 0.5 mmol). The residue was purified by flash chromatography (hexane/ethyl acetate = 20:1) on silica gel to yield the desired product **3al** as white solid (40 mg, 40.5% yield), mp 108-109 °C.

<sup>1</sup>H NMR (500 MHz, CDCl<sub>3</sub>) δ 8.82 (d, *J* = 4.6 Hz, 1H), 8.37 (d, *J* = 7.9 Hz, 1H), 7.89

(t,  $J = 7.7$  Hz, 1H), 7.83 (d,  $J = 7.3$  Hz, 1H), 7.67 (d,  $J = 7.7$  Hz, 1H), 7.47-7.38 (m, 3H).  $^{13}\text{C}$  NMR (125 MHz,  $\text{CDCl}_3$ )  $\delta$  161.47, 151.09, 150.29, 146.14, 141.81, 137.05, 126.02, 125.52, 124.91, 123.45, 120.65, 111.22.  $m/z$  (MS): 197  $[\text{M}+\text{H}]^+$ .

### 2-(Thiophenyl)benzoxazole (**3am**, CAS: 23999-63-5)<sup>[5]</sup>

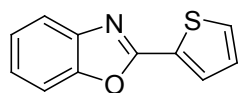

The reaction was conducted with *o*-aminophenol (**1a**, 109.1 mg, 1.0 mmol), 2-(2-phenylethynyl)thiophene (**2m**, 92 mg, 0.5 mmol). The residue was purified by flash chromatography (hexane/ethyl acetate = 40:1) on silica gel to yield the desired product **3am** as white solid (41 mg, 41% yield), mp 81-83 °C.

$^1\text{H}$  NMR (500 MHz;  $\text{CDCl}_3$ )  $\delta$  7.92 (d,  $J = 3.3$  Hz, 1H), 7.74-7.73 (m, 1H), 7.57-7.54 (m, 2H), 7.35-7.33 (m, 2H), 7.20-7.18 (m, 1H).  $^{13}\text{C}$  NMR (125 MHz,  $\text{CDCl}_3$ )  $\delta$  159.07, 150.48, 142.06, 130.21, 129.94, 129.71, 128.23, 125.07, 124.72, 119.83, 110.42.  $m/z$  (MS): 202  $[\text{M}+\text{H}]^+$ .

### 6-Methyl-2-phenylbenzo[*d*]oxazole (**3bn**, CAS: 14016-00-3)<sup>[6]</sup>

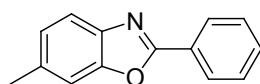

The reaction was conducted with 2-amino-5-methylphenol (**1b**, 123.1 mg, 1.0 mmol), diphenylacetylene (**2n**, 89 mg, 0.5 mmol). The residue was purified by flash chromatography (hexane/ethyl acetate = 40:1) on silica gel to yield the desired product **3bn** as pale yellow solid (177.7 mg, 85% yield), mp 91-92 °C.

$^1\text{H}$  NMR (500 MHz,  $\text{CDCl}_3$ )  $\delta$  8.25-8.21 (m, 2H), 7.64 (d,  $J = 8.1$  Hz, 1H), 7.52-7.49 (m, 3H), 7.37-7.36 (m, 1H), 7.17-7.14 (m, 1H), 2.49 (s, 3H).  $^{13}\text{C}$  NMR (125 MHz,  $\text{CDCl}_3$ )  $\delta$  162.50, 151.01, 139.88, 135.49, 131.19, 128.79, 127.40, 127.32, 125.74, 119.28, 110.69, 21.71.  $m/z$  (MS): 210  $[\text{M}+\text{H}]^+$ .

### 6-Chloro-2-phenylbenzo[*d*]oxazole (**3co**, CAS: 15952-20-2)<sup>[7]</sup>

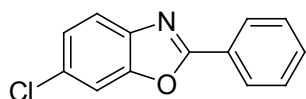

The reaction was conducted with 3-chloro-6-aminophenol (**1c**, 143 mg, 1.0 mmol), diphenylacetylene (**2o**, 89 mg, 0.5 mmol). The residue was purified by flash chromatography (hexane/ethyl acetate = 40:1) on silica gel to yield the desired product **3co** as yellow solid (190.1 mg, 83% yield), mp 107-108 °C.

<sup>1</sup>H NMR (500 MHz, CDCl<sub>3</sub>) δ 8.21-8.19 (m, 2H), 7.65 (d, *J* = 8.4 Hz, 1H), 7.56 (d, *J* = 1.8 Hz, 1H), 7.54-7.49 (t, *J* = 7.5 Hz, 3H), 7.33-7.31 (m, 1H). <sup>13</sup>C NMR (125 MHz, CDCl<sub>3</sub>) δ 163.59, 150.80, 140.78, 131.74, 131.45, 128.90, 128.84, 127.56, 125.21, 120.38, 111.17. *m/z* (MS): 230 [M+H]<sup>+</sup>.

### 2-Propylbenzo[d]oxazole (**3ap**, CAS: 2008-05-1)<sup>[8]</sup>

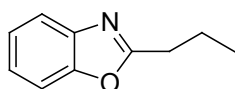

The reaction was conducted with *o*-aminophenol (**1a**, 109.1 mg, 1.0 mmol), pent-1-ynyl-benzene (**2p**, 72 mg, 0.5 mmol). The residue was purified by flash chromatography (hexane/ethyl acetate = 40:1) on silica gel to yield the desired product **3ap** as pale yellow oil (29 mg, 36.5% yield).

<sup>1</sup>H NMR (500 MHz, CDCl<sub>3</sub>) δ 7.65-7.68 (m, 1H), 7.45-7.48 (m, 1H), 7.27-7.30 (m, 2H), 2.92 (t, *J* = 5.1 Hz, 2H), 1.85-1.91 (m, 2H), 0.89 (t, *J* = 5.1 Hz, 3H). <sup>13</sup>C NMR (125 MHz, CDCl<sub>3</sub>) δ 167.32, 150.59, 141.42, 124.34, 123.99, 119.49, 110.17, 31.37, 22.43, 13.97. *m/z* (MS): 162 [M+H]<sup>+</sup>.

### Benzo[d]oxazole (**3aq**, CAS: 273-53-0)<sup>[9]</sup>

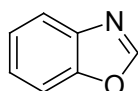

The reaction was conducted with *o*-aminophenol (**1a**, 109.1 mg, 1.0 mmol), phenylacetylene (**2r**, 80.5 mg, 0.5 mmol). The residue was purified by flash chromatography (hexane/ethyl acetate = 40:1) on silica gel to yield the desired product **3aq** as colorless oil (25 mg, 41.5% yield).

$^1\text{H}$  NMR (400 MHz,  $\text{CDCl}_3$ )  $\delta$  8.09 (s, 1H), 7.80-7.77 (m, 1H), 7.59-7.56 (m, 1H), 7.39-7.35 (m, 2H).  $^{13}\text{C}$  NMR (100 MHz,  $\text{CDCl}_3$ )  $\delta$  152.44, 149.88, 139.94, 125.53, 124.52, 120.53, 112.22.  $m/z$  (MS): 120  $[\text{M}+\text{H}]^+$ .

## References

- (1) M. Kidwai, V. Bansal, A. Saxena, S. Aerry, S. Mozumdar, *Tetrahedron Lett.*, 2006, **47**, 8049-8053.
- (2) G. Evindar, R. A. Batey, *J. Org. Chem.*, 2006, **71**, 1802-1808.
- (3) Z. B. Hassan, H. N. Khadijeh, *Eur. J. Org. Chem.*, 2009, **29**, 4926-4929.
- (4) L. Ackermann, A. Althammer, S. Fenner, *Angew. Chem., Int. Ed.*, 2009, **48**, 201.
- (5) J. A. Seijas, M. P. Vázquez-Tato, M. R. Carballido-Reboredo, J. Crecente-Campo, L. Romar-López, *Synlett.*, 2007, **2**, 313-317.
- (6) A. J. Blacker, M. M. Farah, M. I. Hall, S. P. Marsden, O. Saidi, J. M. Williams, *Org. Lett.*, 2009, **11**, 2039-2042.
- (7) J. Peng, C. Zong, M. Ye, T. Chen, D. Gao, Y. Wang, C. Chen, *Org. Biomol. Chem.*, 2011, **9**, 1225.
- (8) V. I. Cohen, S. Pourabass, *J. Heterocycl. Chem.*, 1977, **14**, 1321.
- (9) J. J. Lee, J. Kim, Y. M. Jun, B. M. Lee, B. H. Kim, *Tetrahedron*, 2009, **65**, 8821.



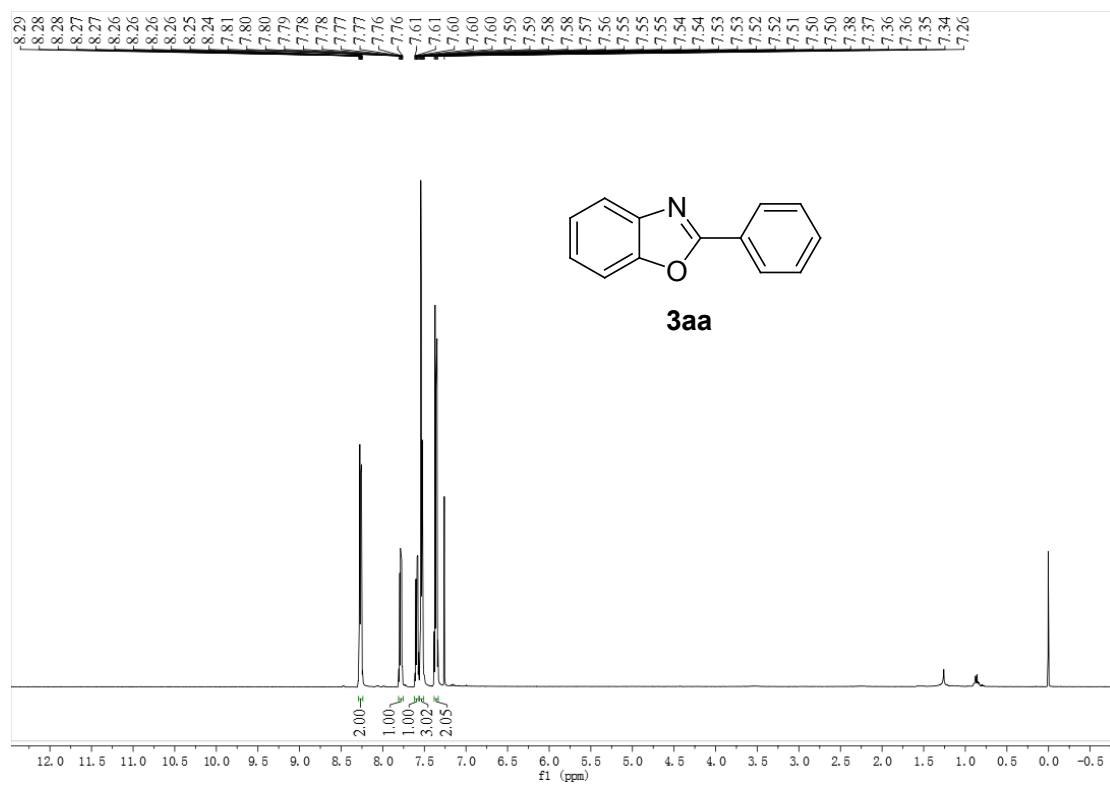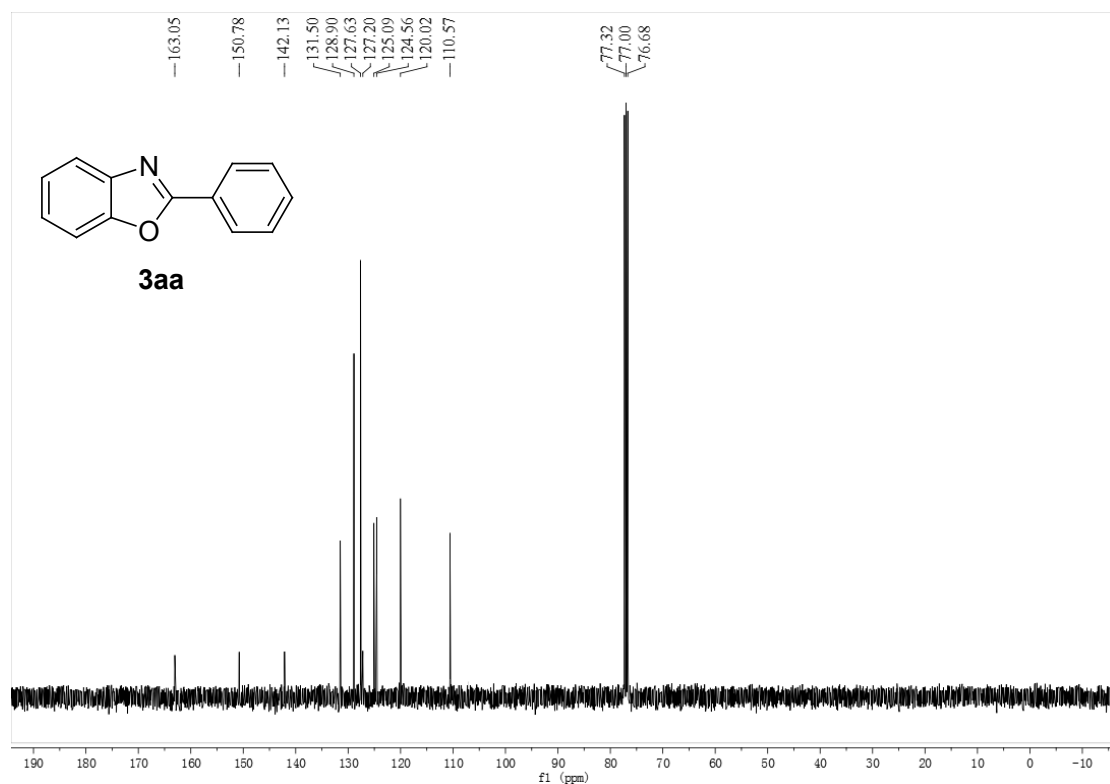

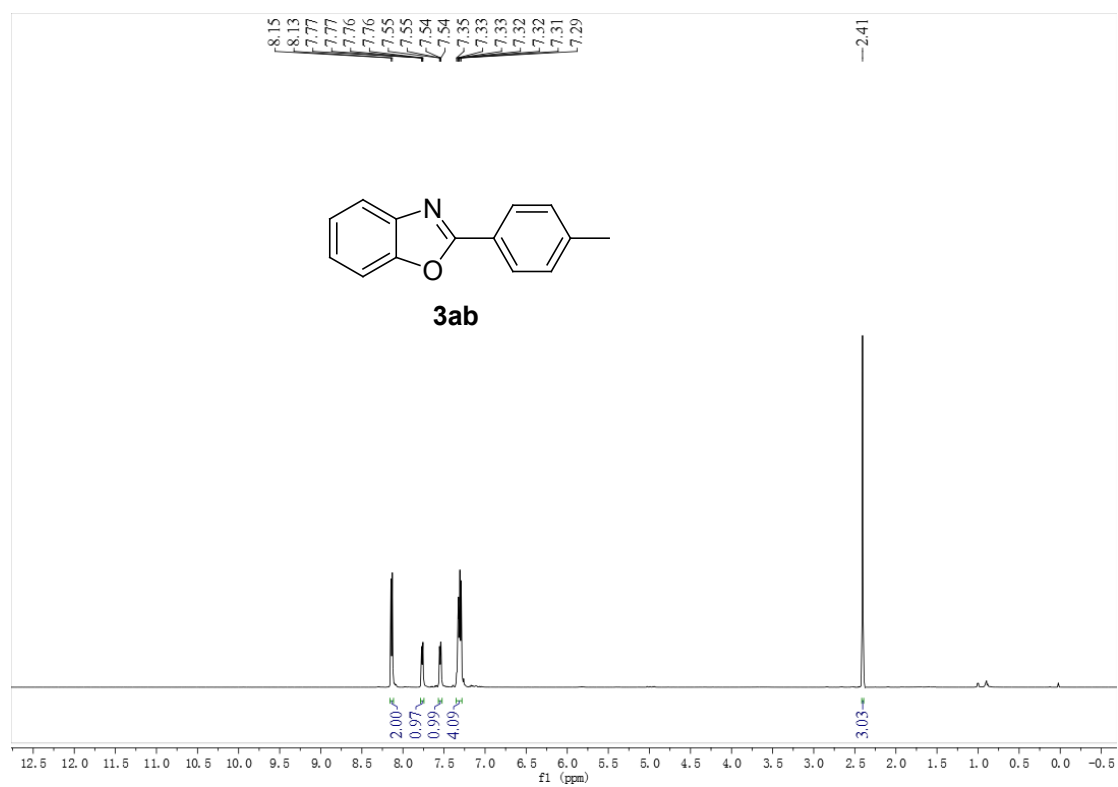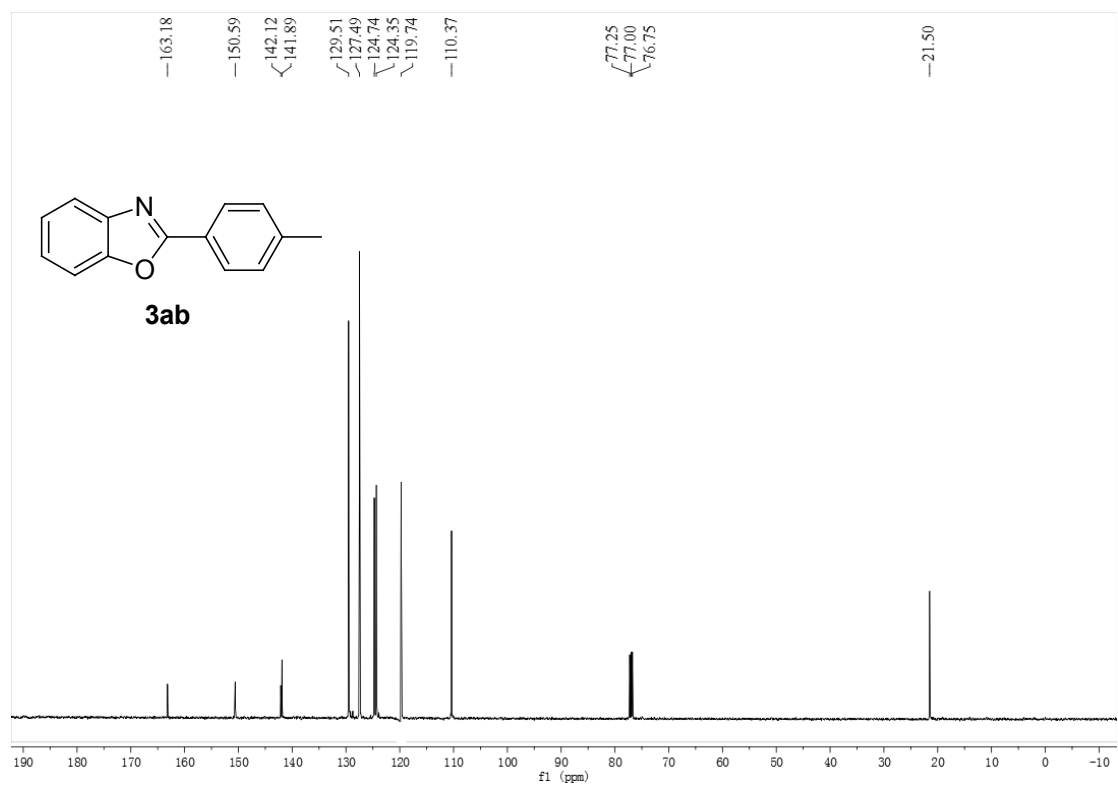

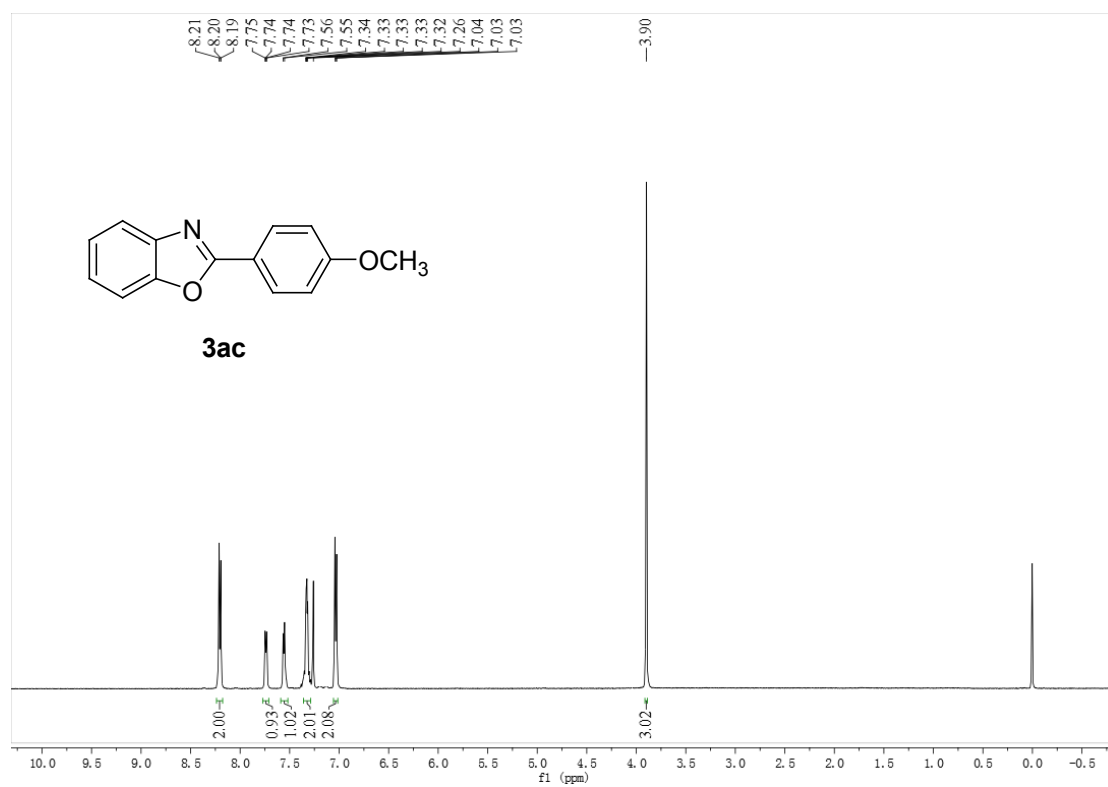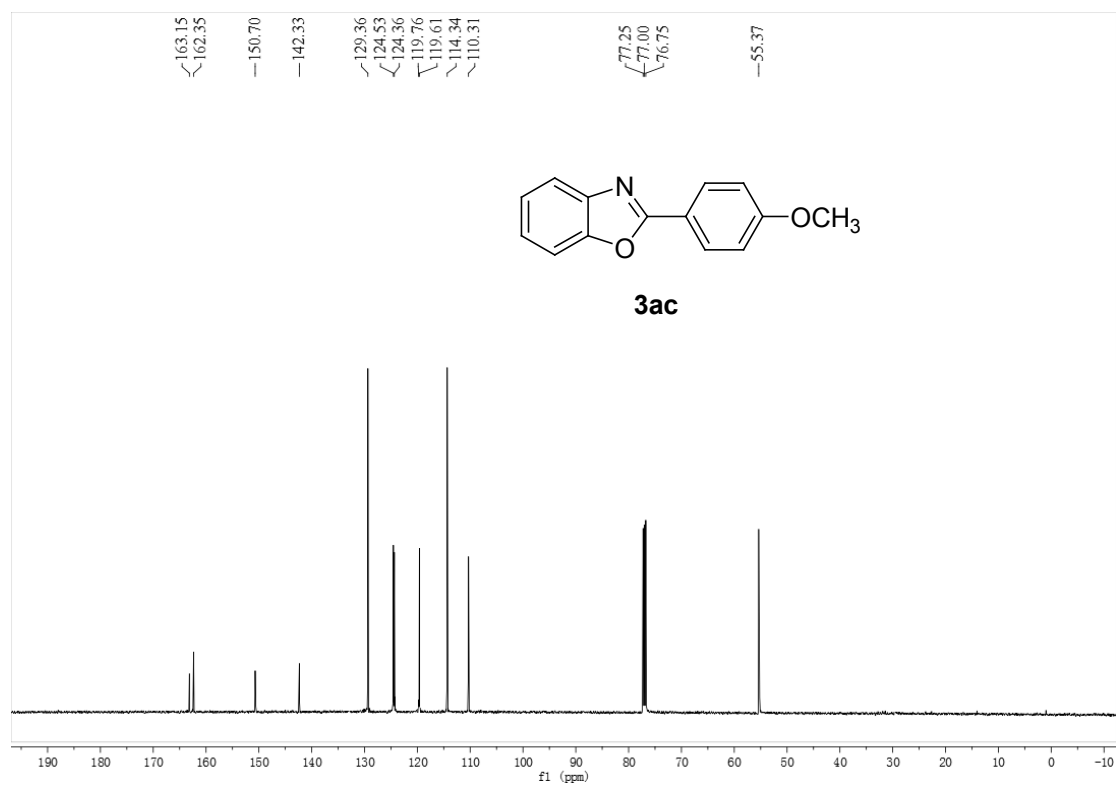

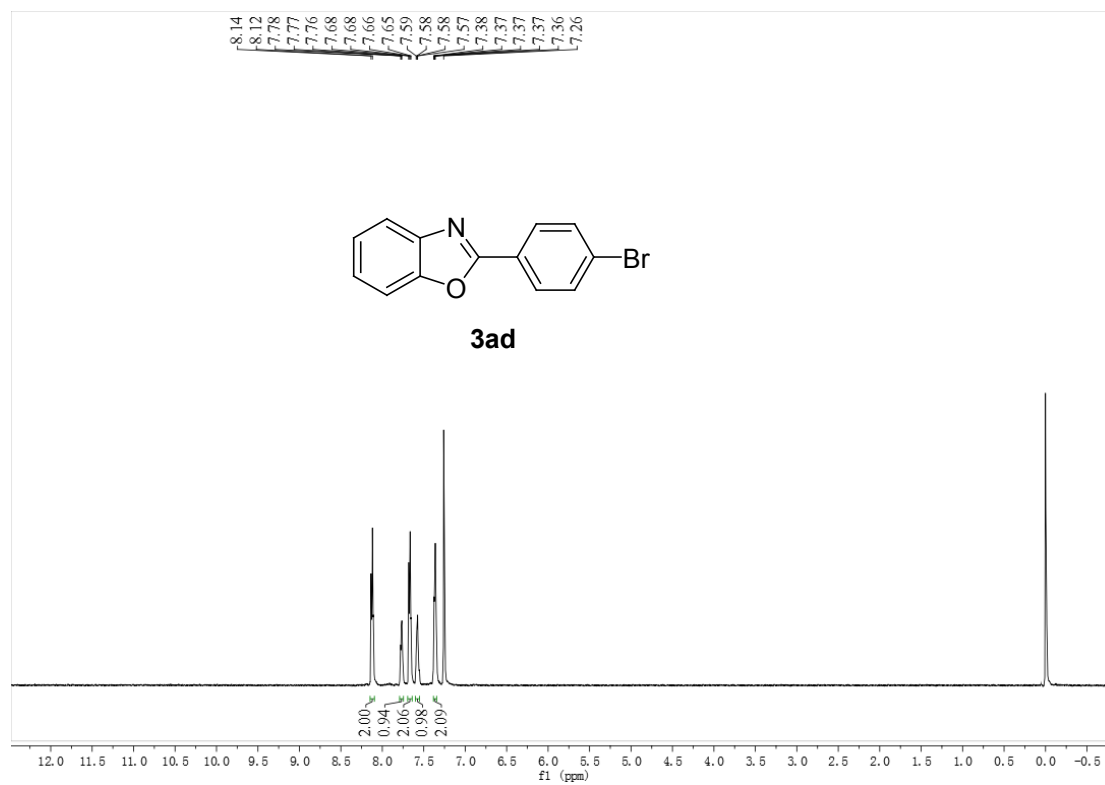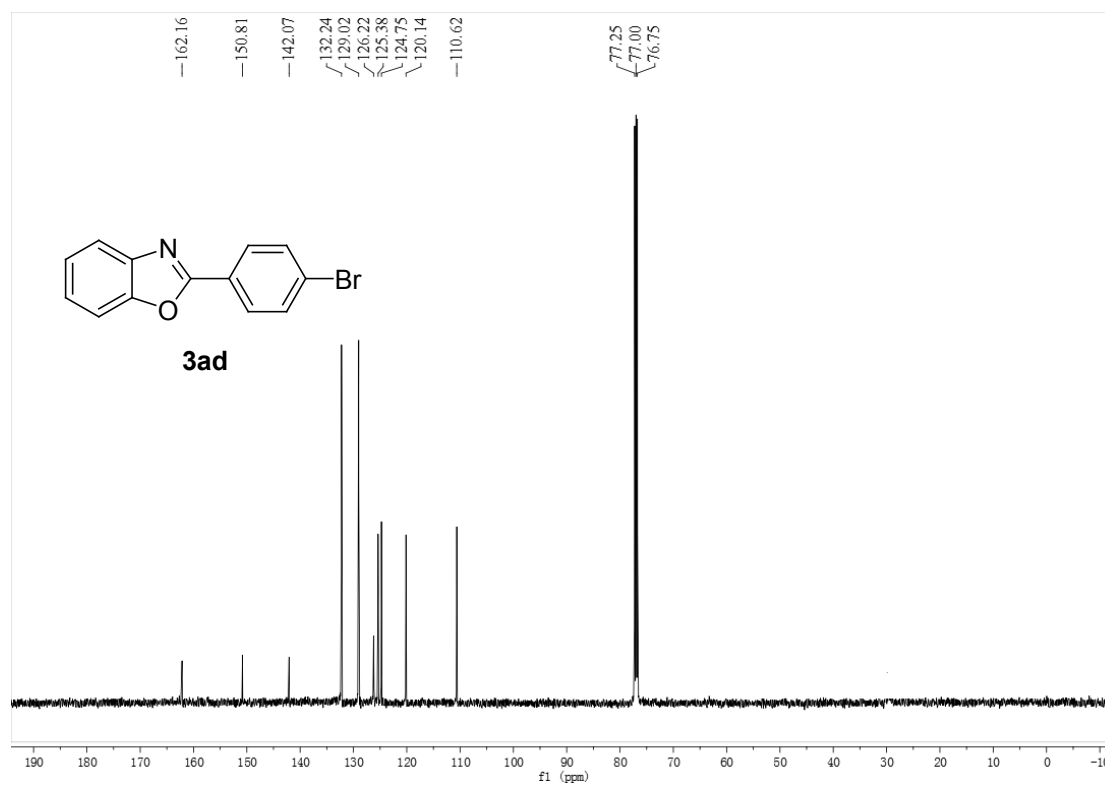

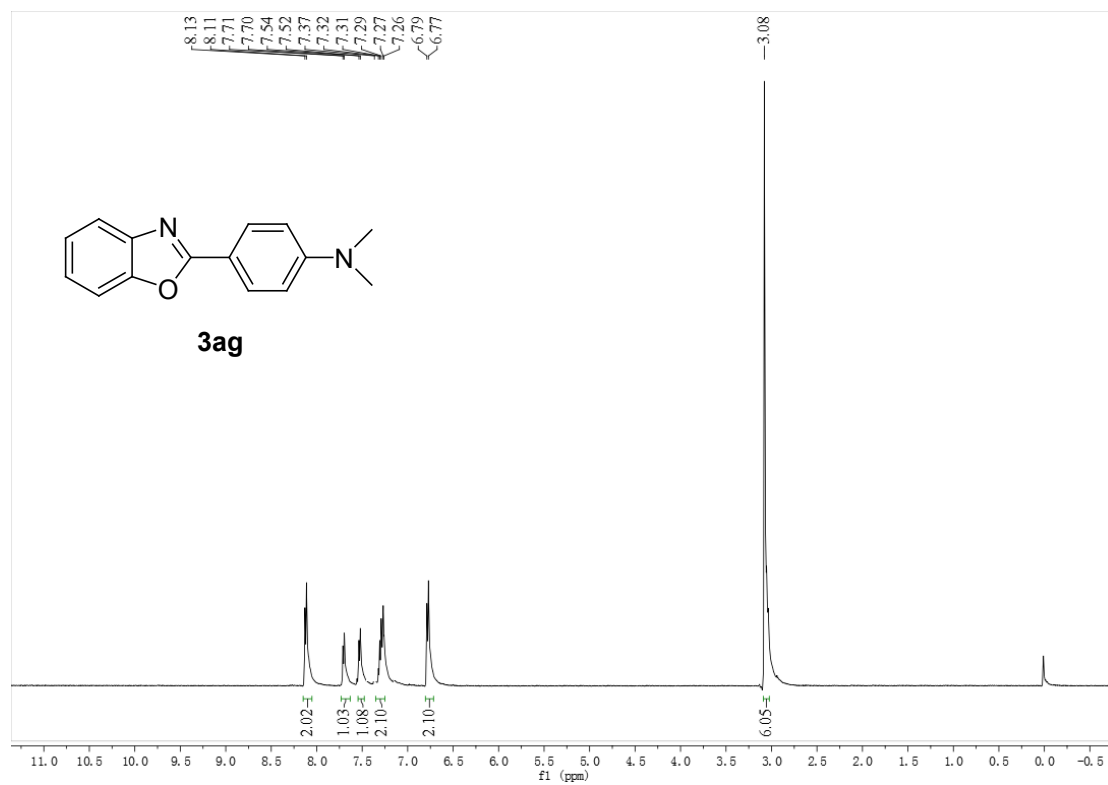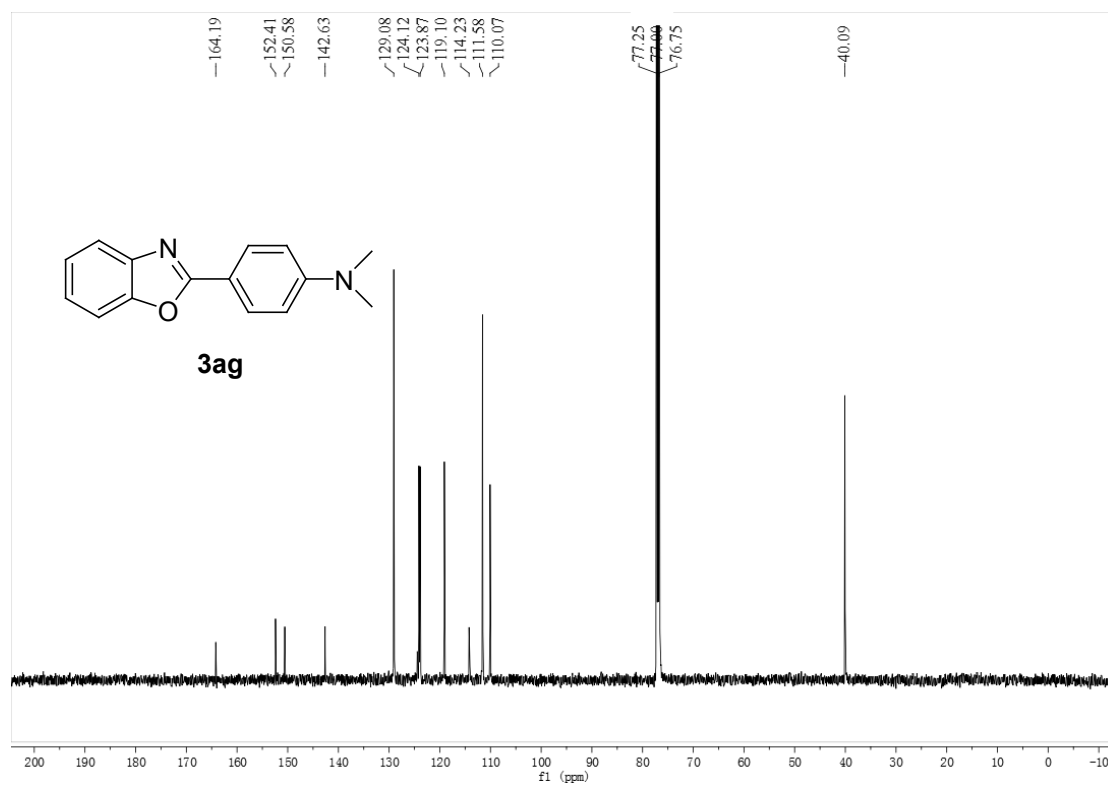

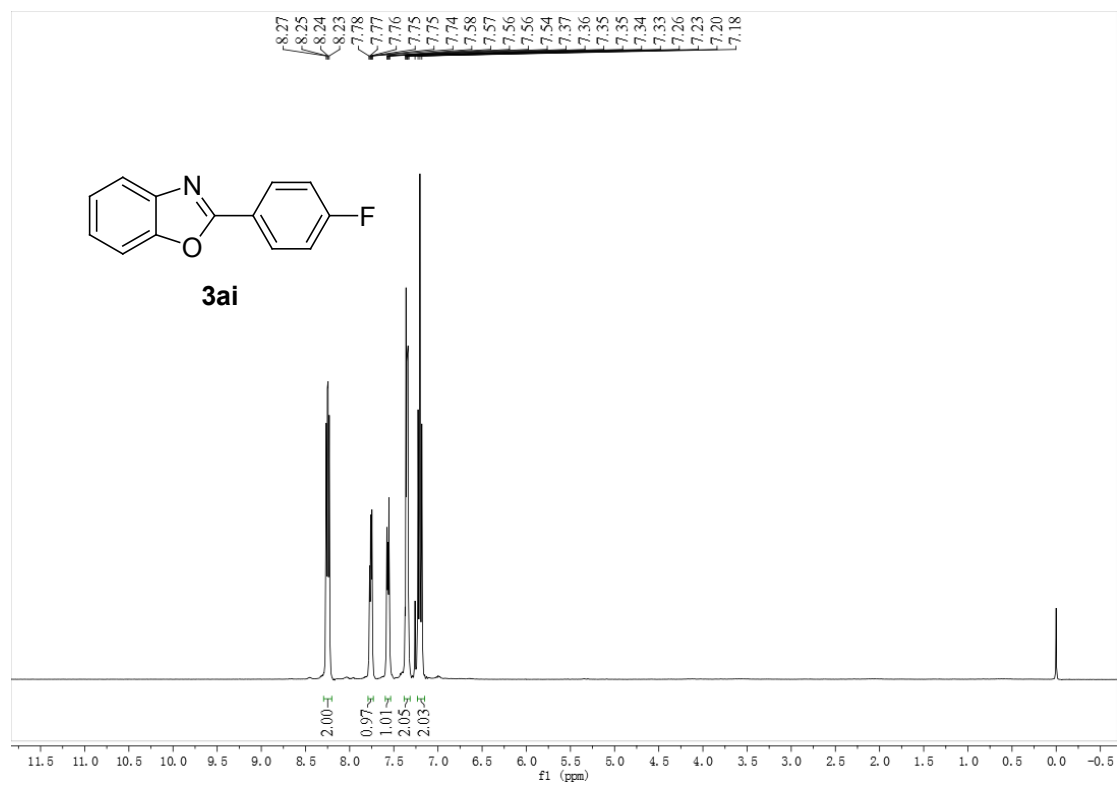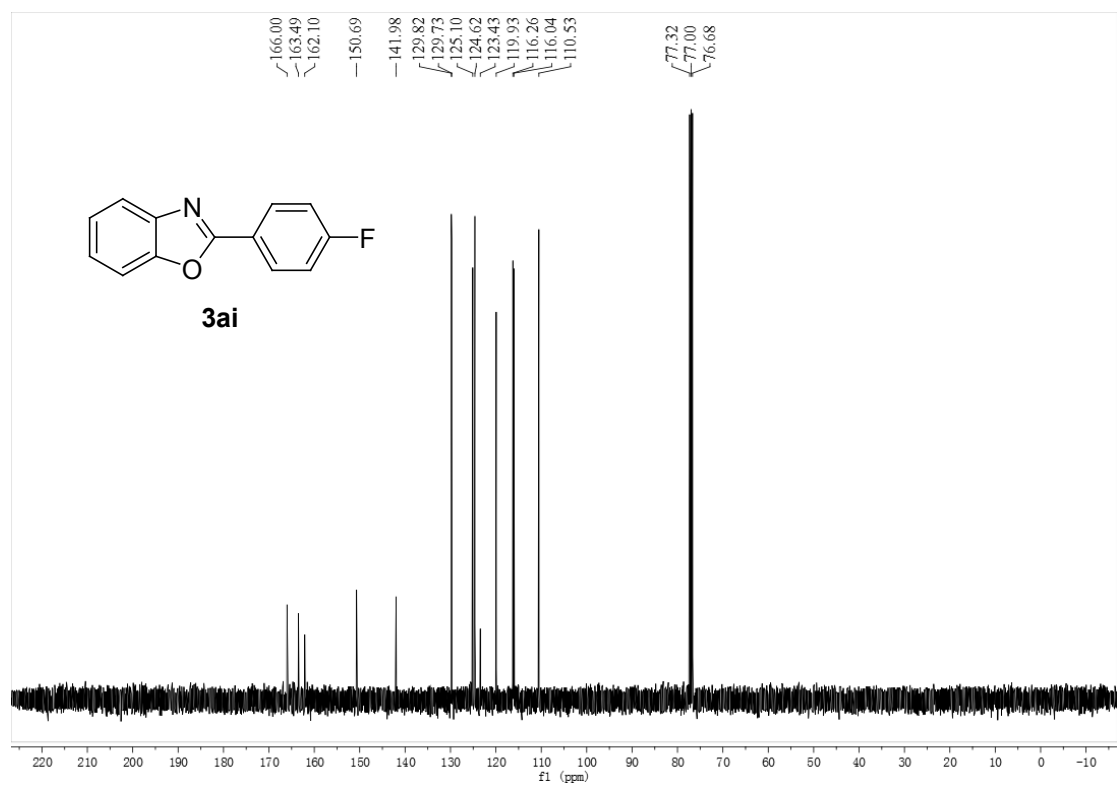

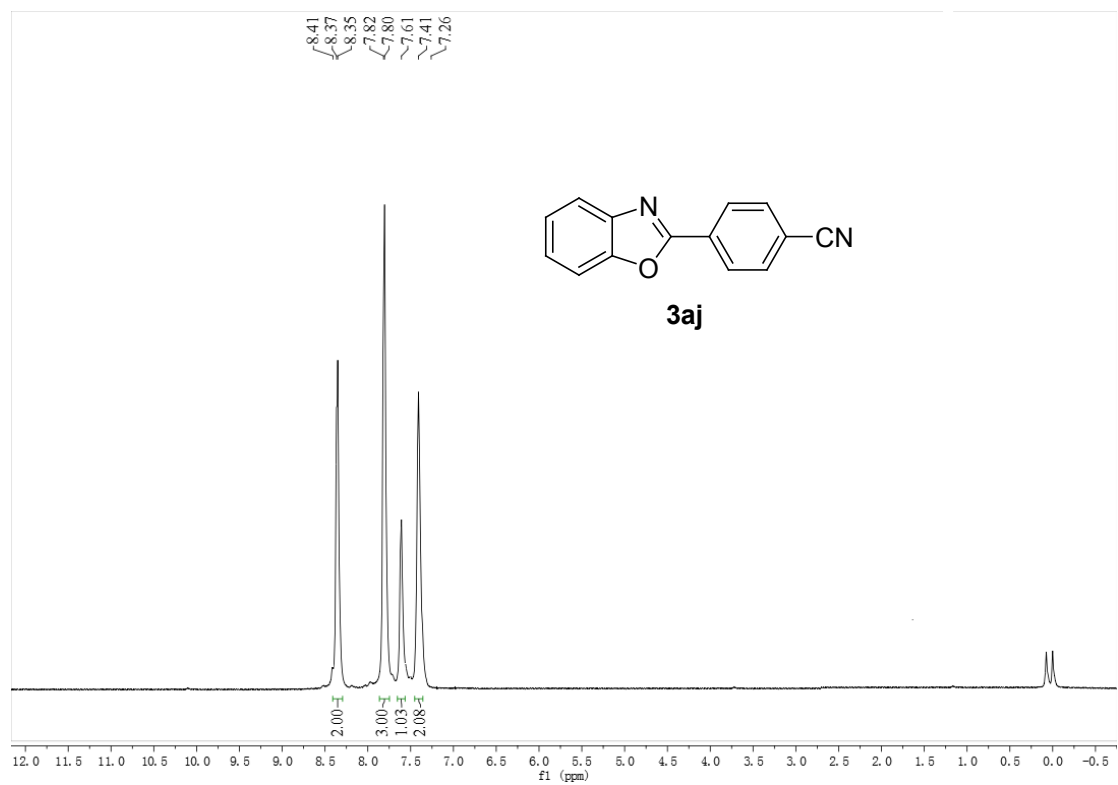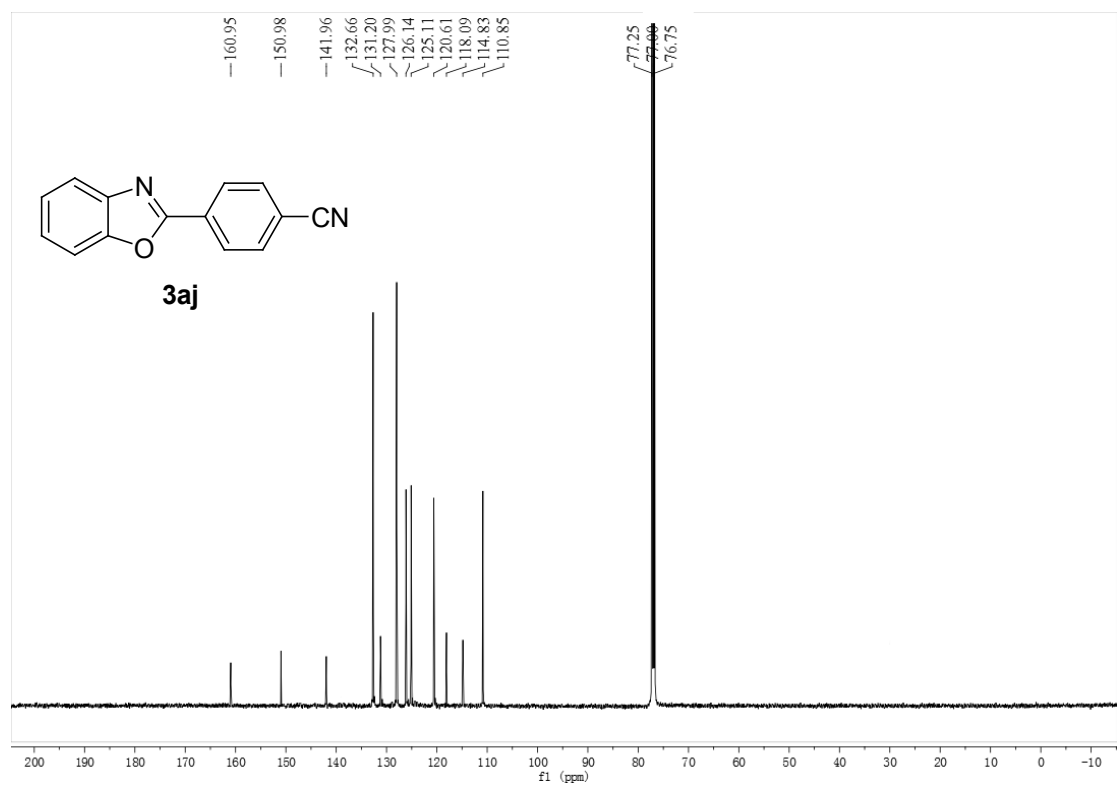

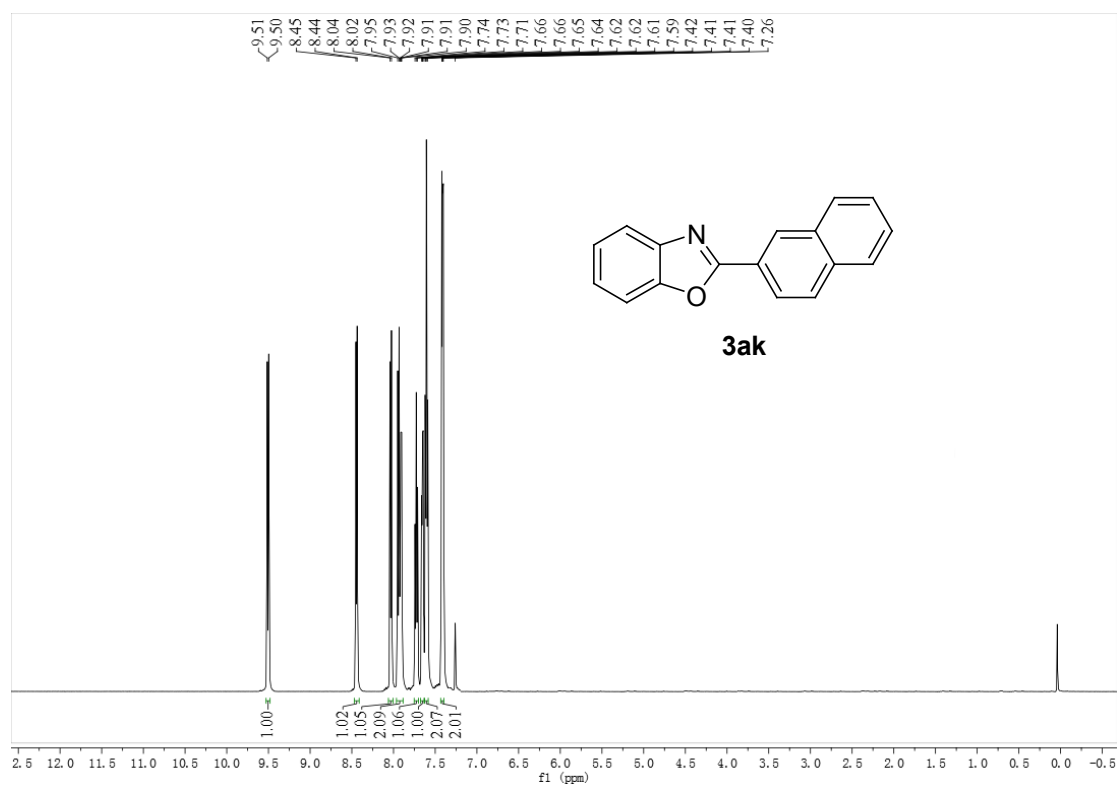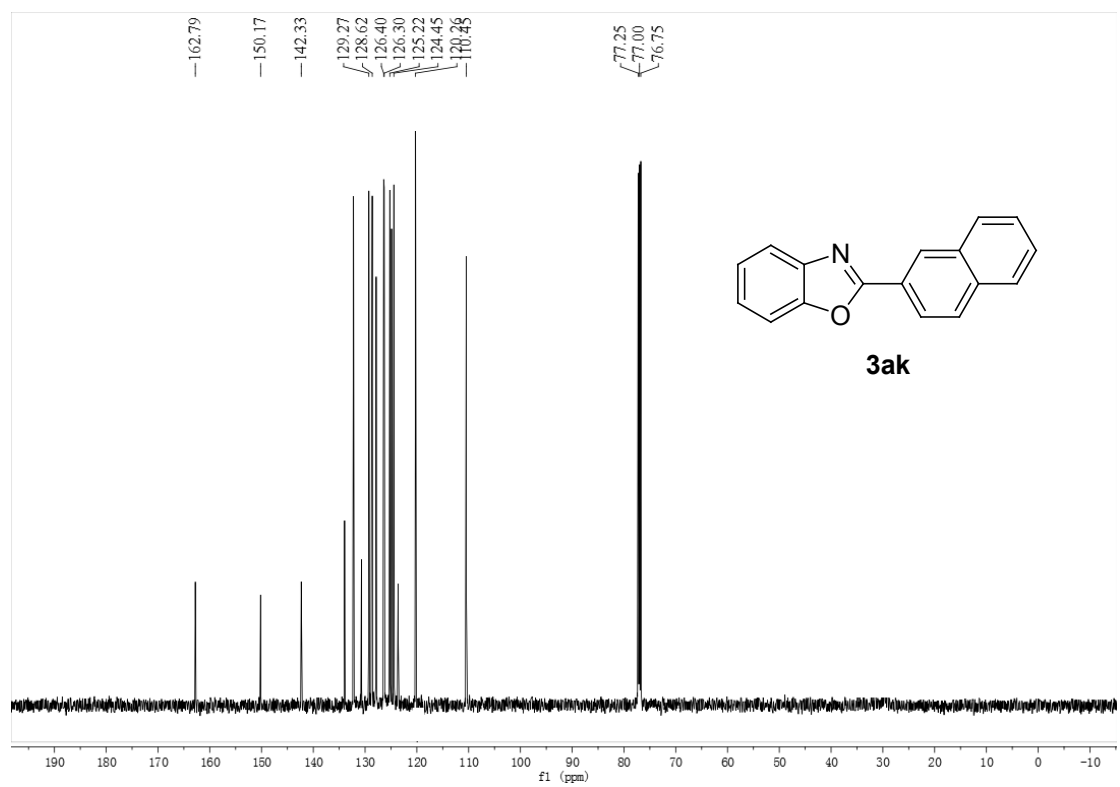



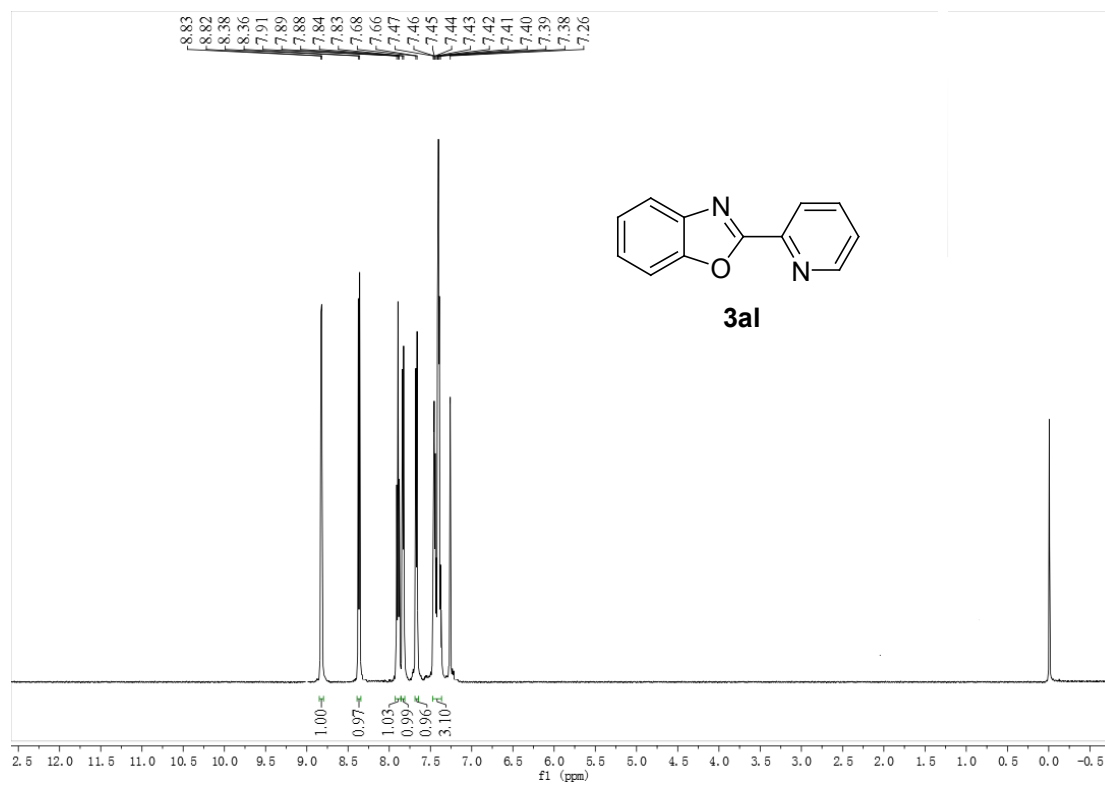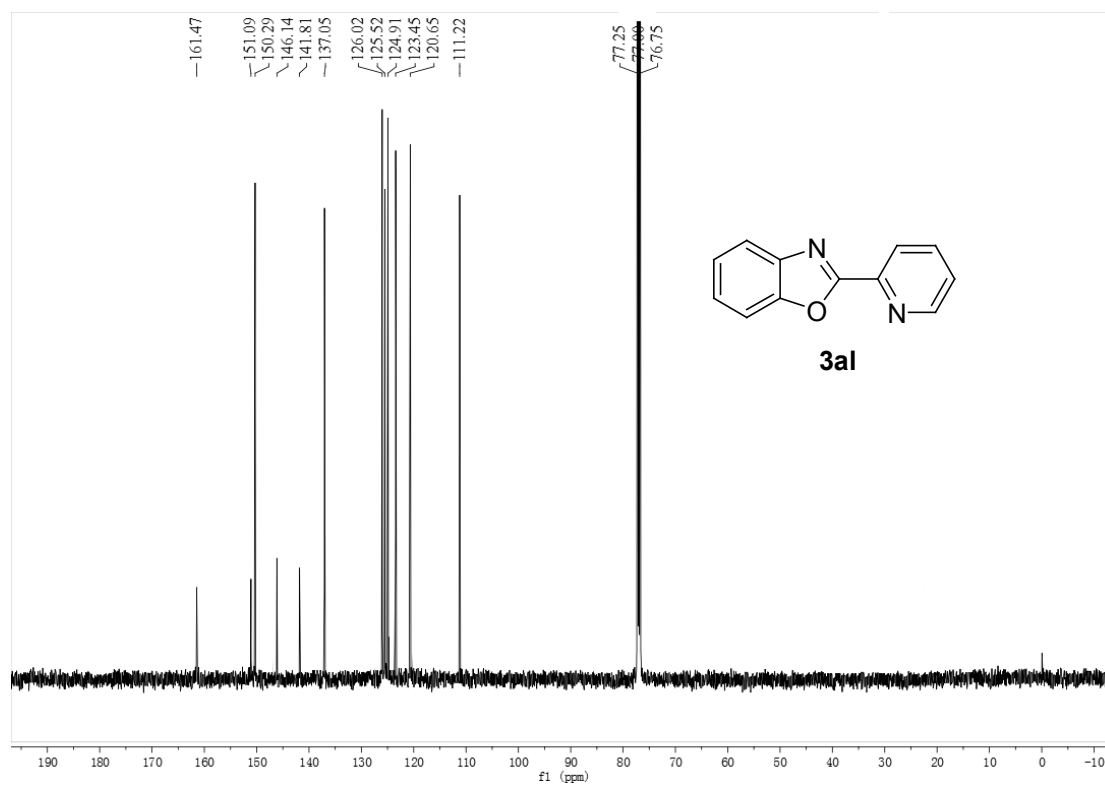

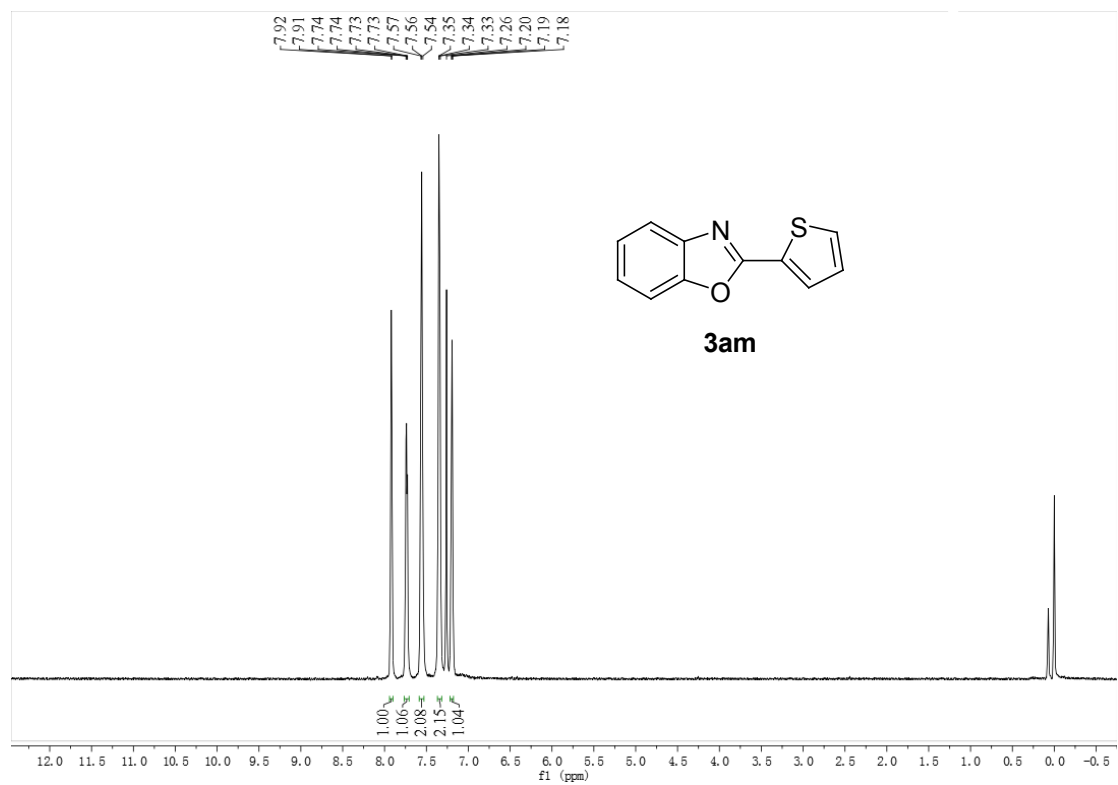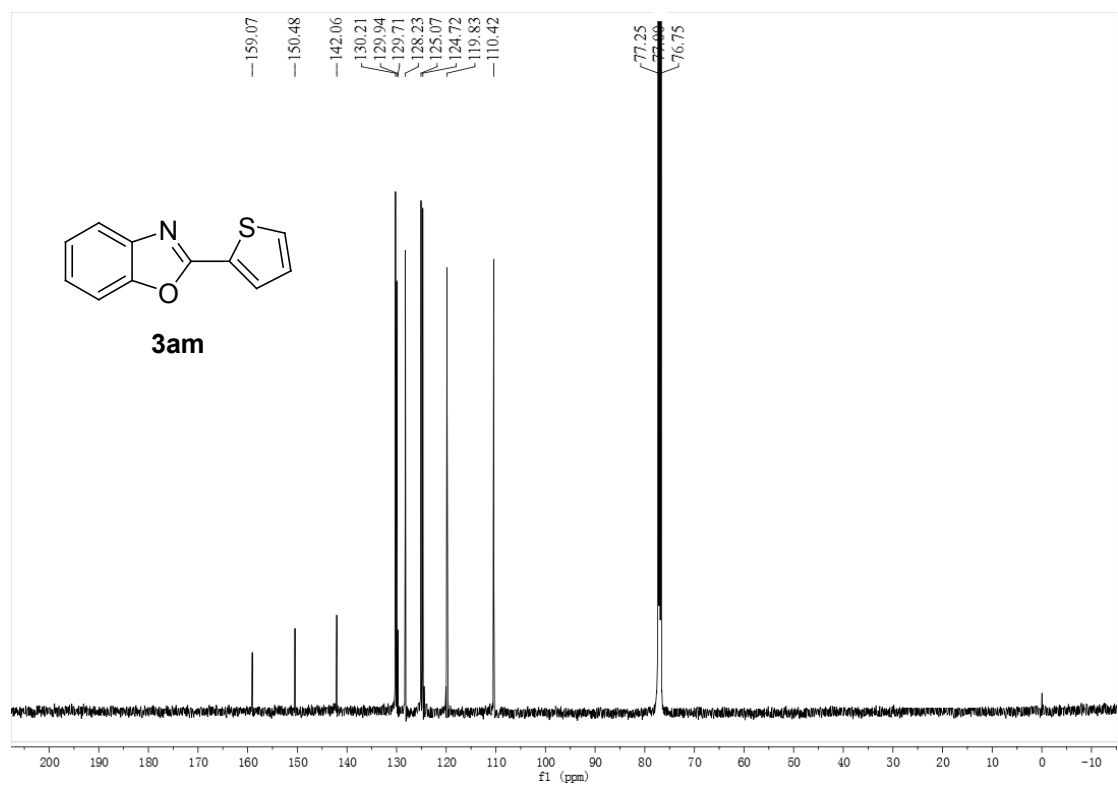

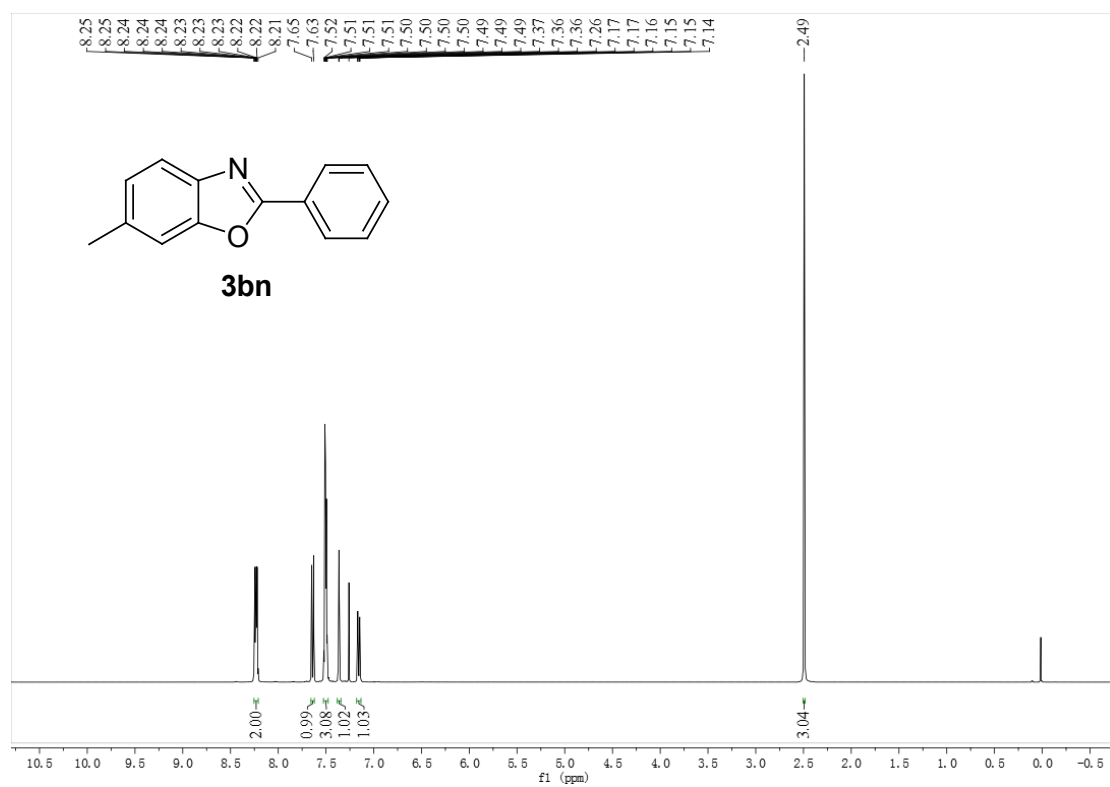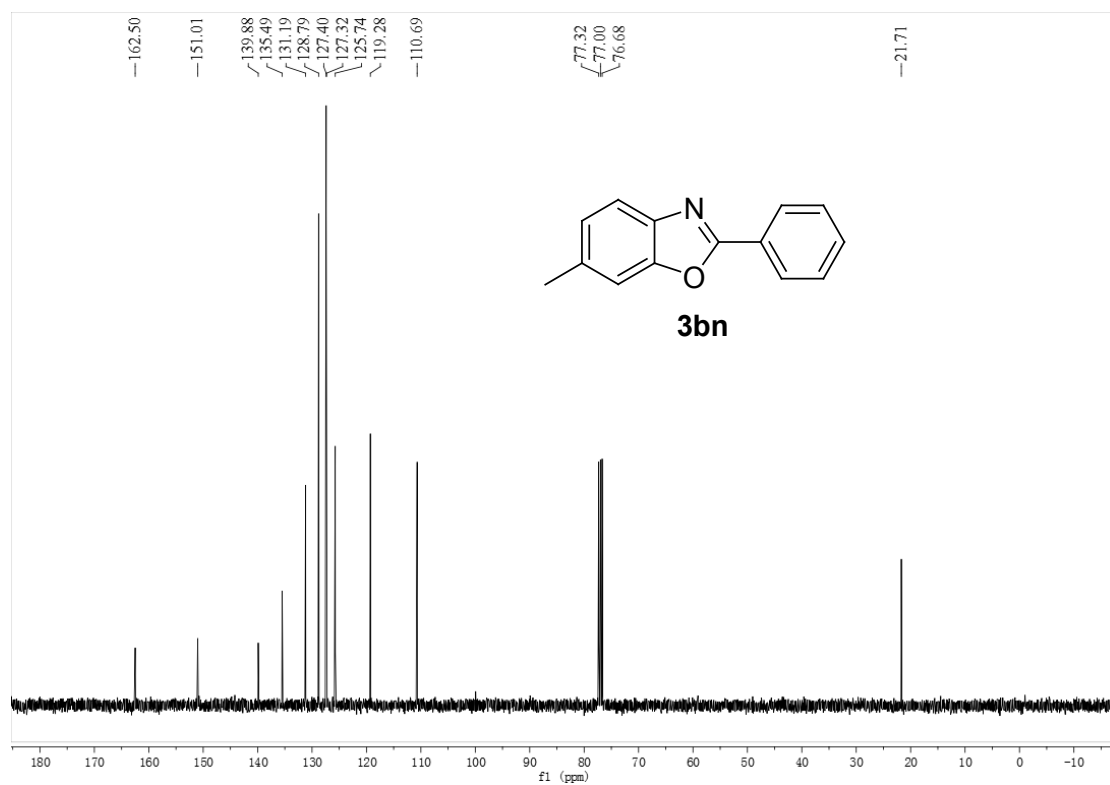

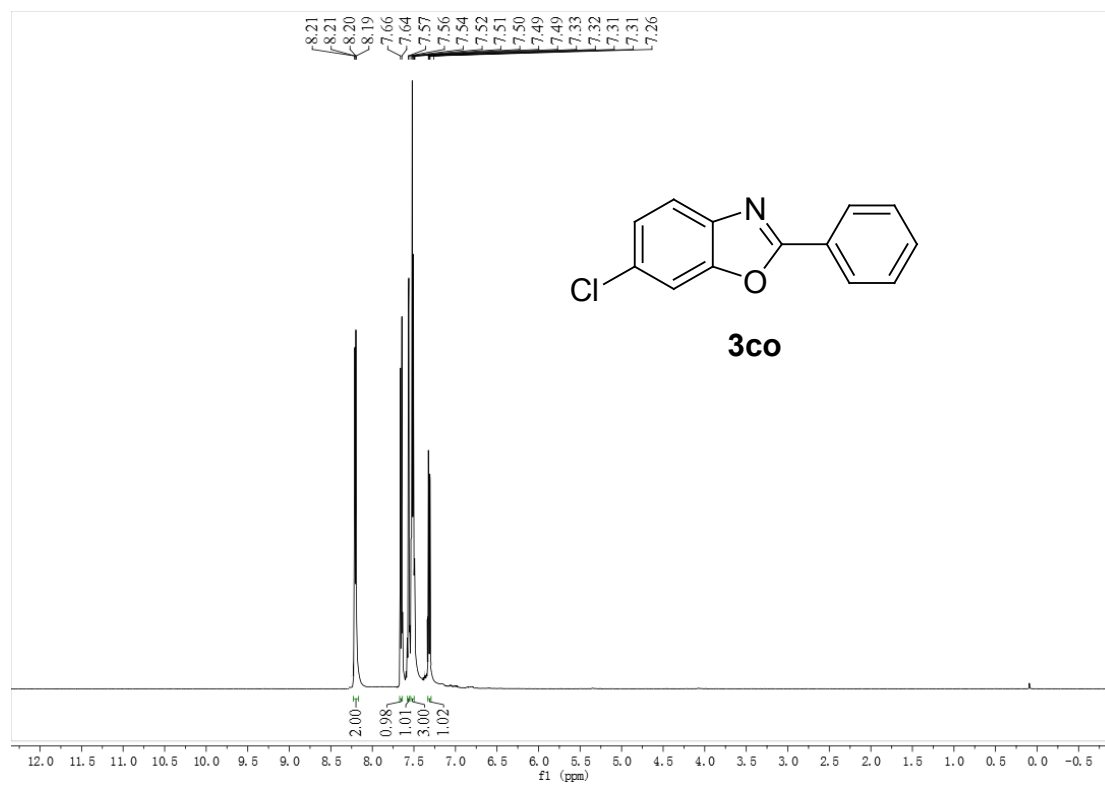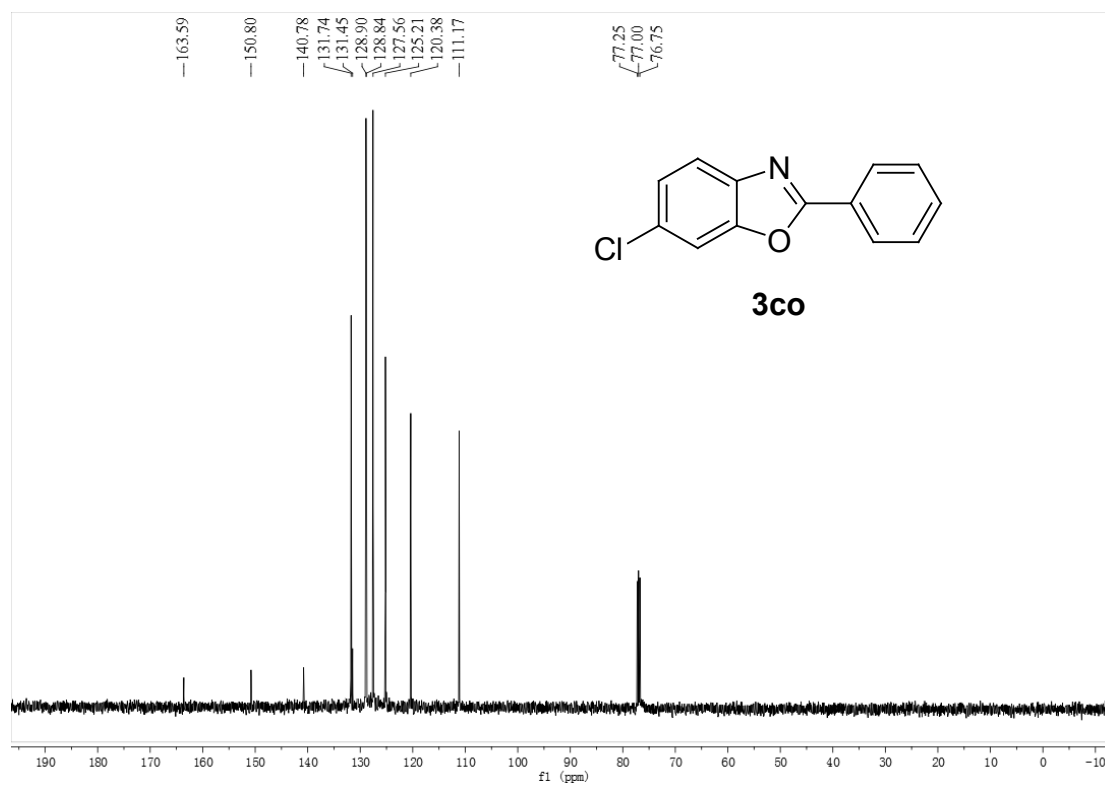

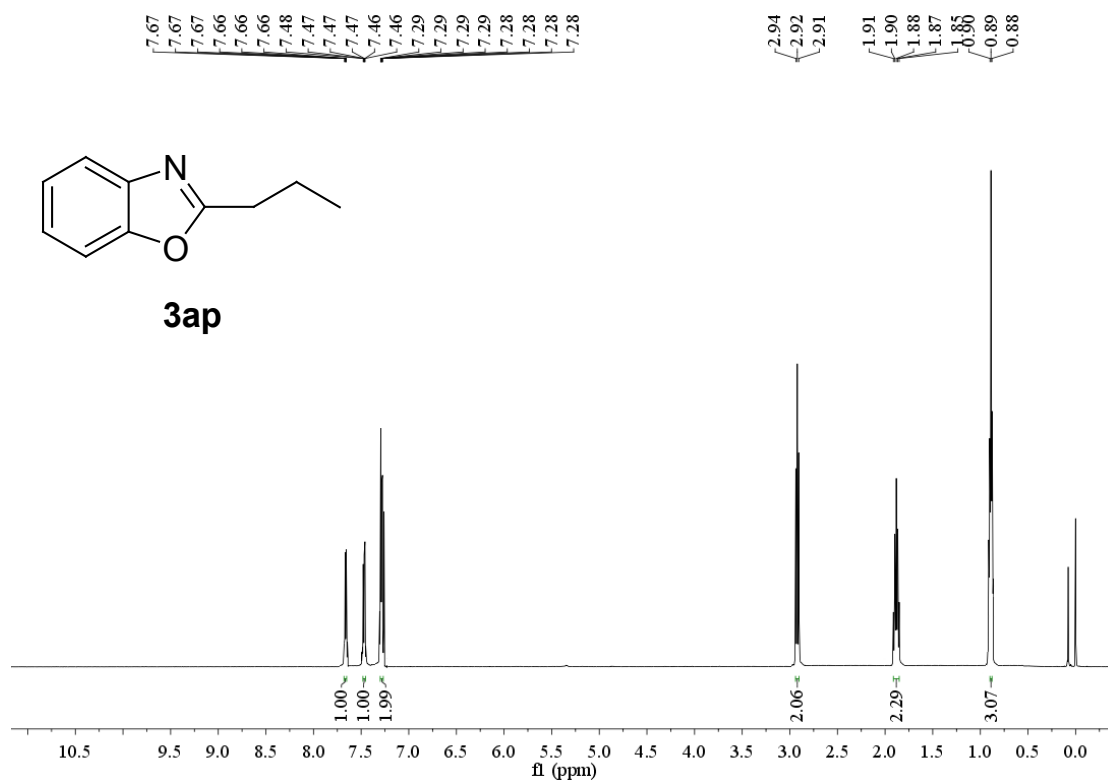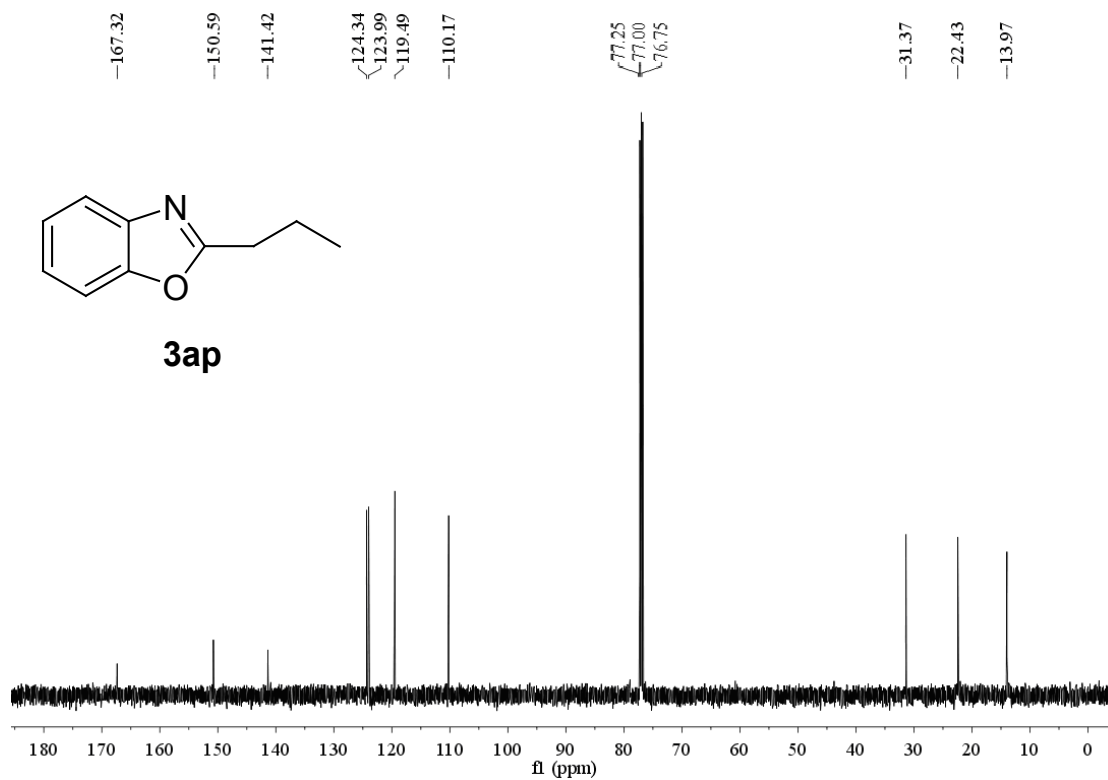

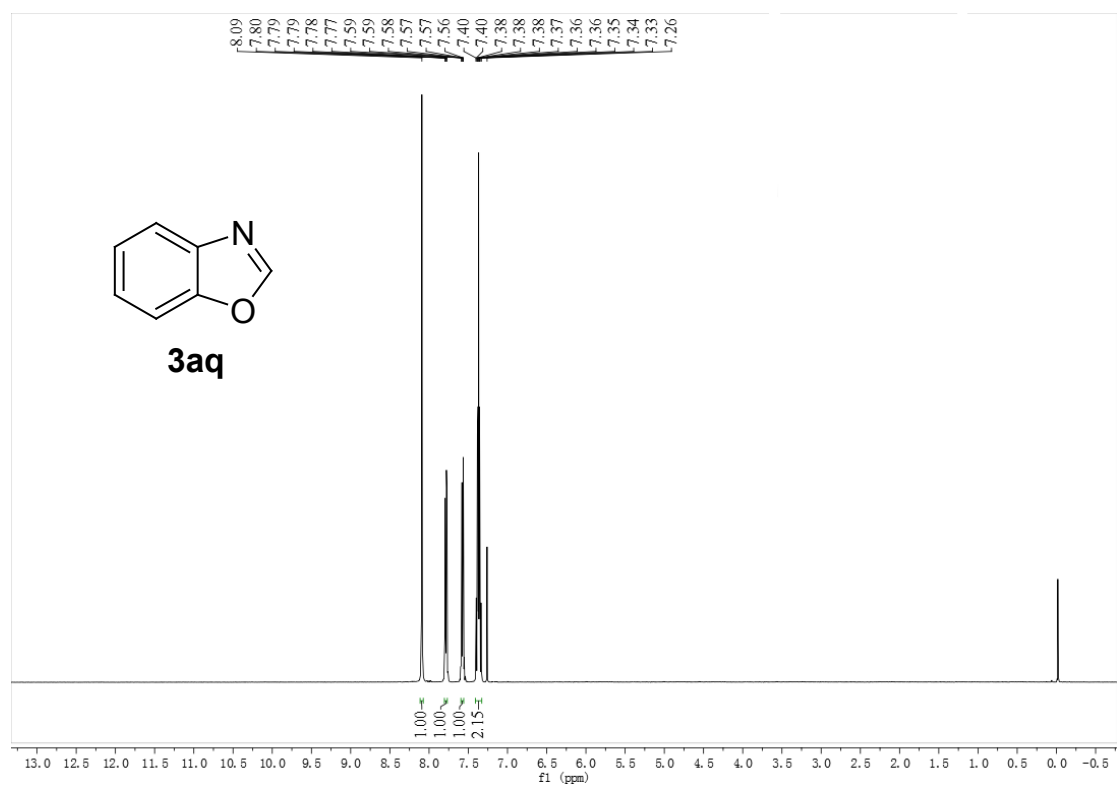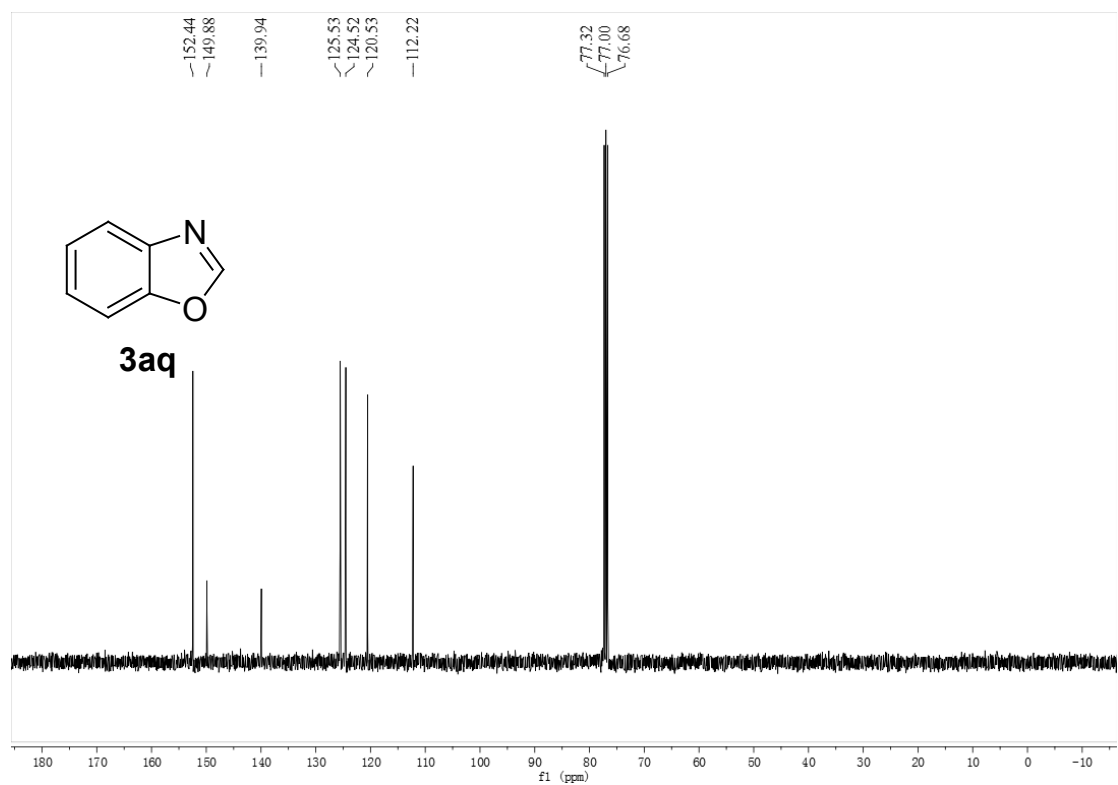

Supplement: c3gc42499e.pdf [file c3gc42499e.pdf]
